# Supplementary material for: Detecting Genetic Isolation in Human Populations: A Study of European Language Minorities
Source: PubMed Central journal article supplement (PMC3572090; doi:10.1371/journal.pone.0056371), 2013-02-13

**Supplementary Figure S1.** Posterior distributions of parameter estimates of **q1**, **q2** and **qa** (effective population size of populations 1,2 and ancestral), **T** (splitting time), **m1>2** (gene flow rate per haplotype from populations 2 to 1) and **m2>1** (gene flow rate per haplotype from populations 1 to 2).

A) Sappada vs Cadore; B) Sappada vs Central-Western Europe; C) Sauris vs Udine; D) Sauris vs Central-Western Europe; E) Timau vs Udine; F) Timau vs Central-Western Europe.

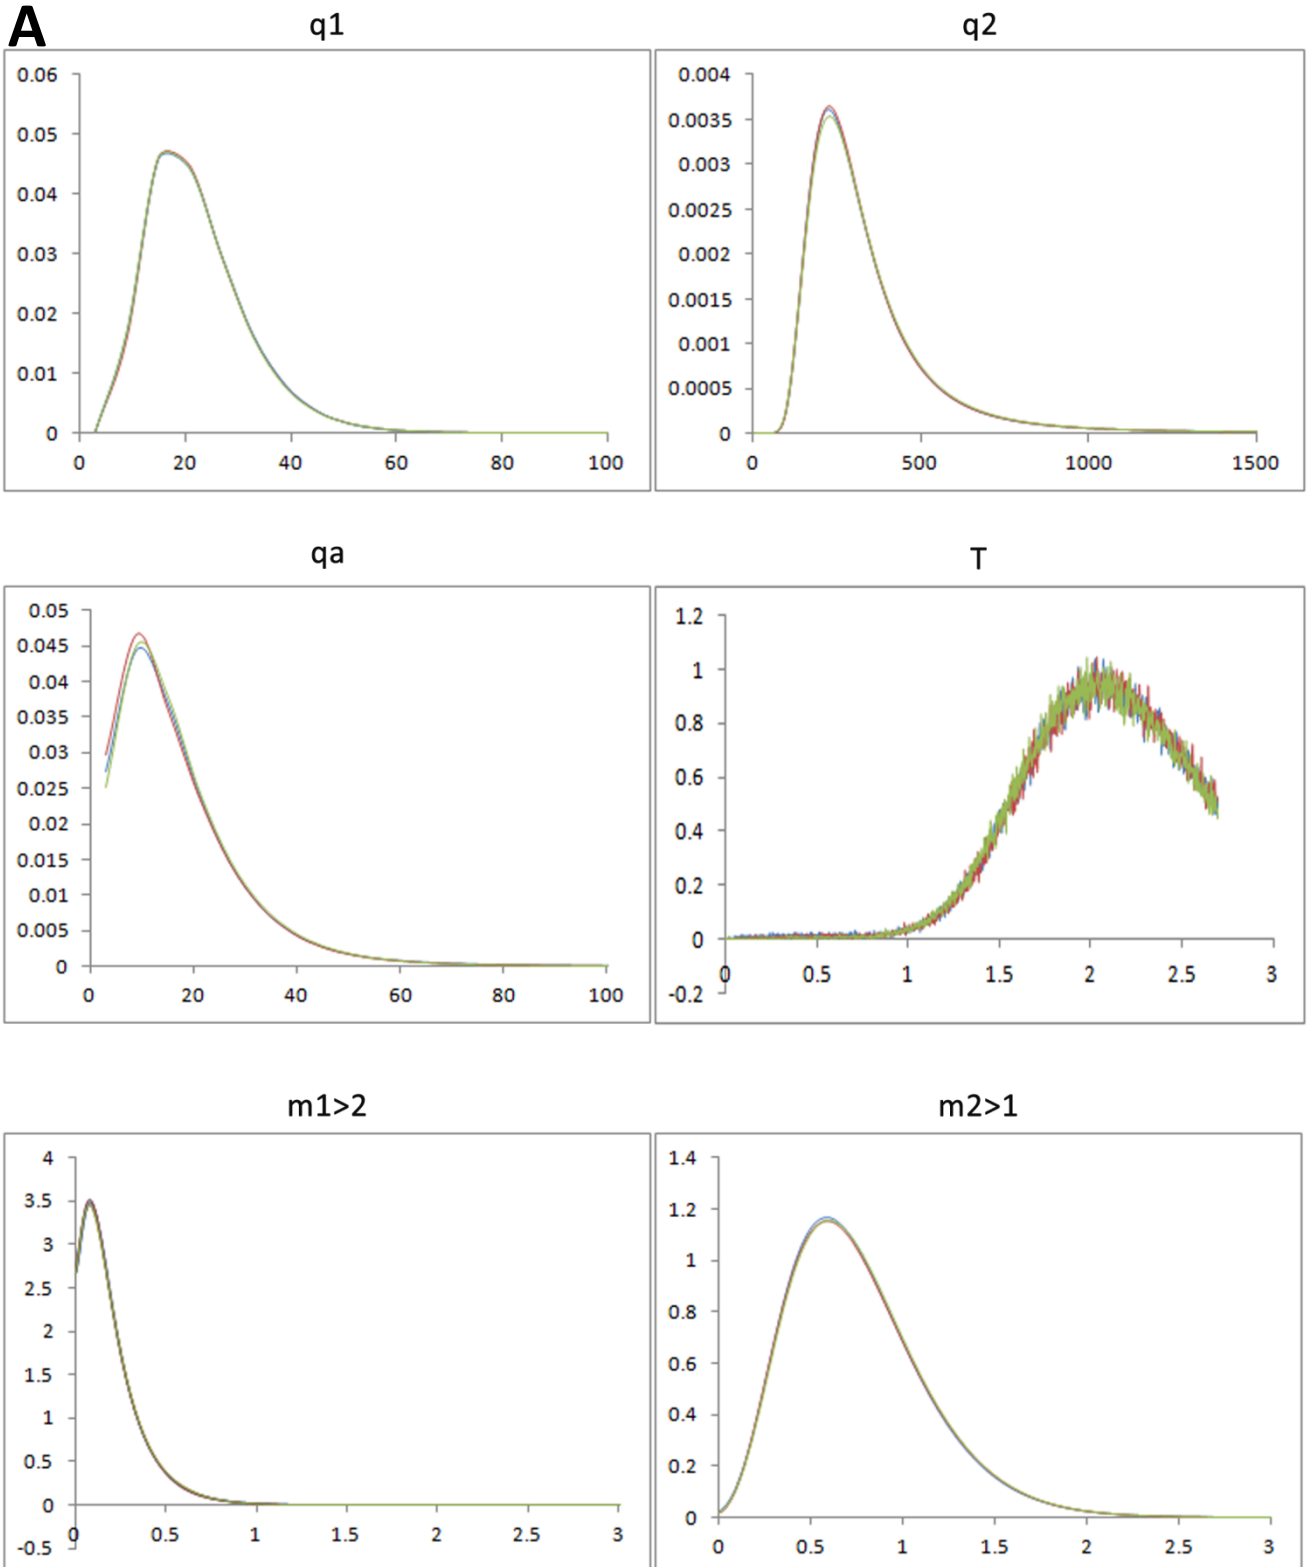

**B**

q1

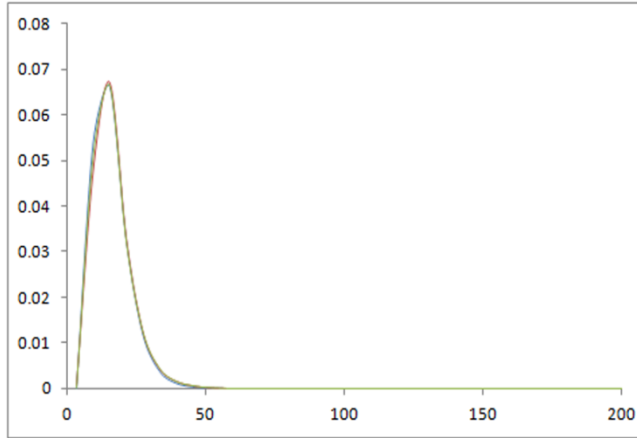

q2

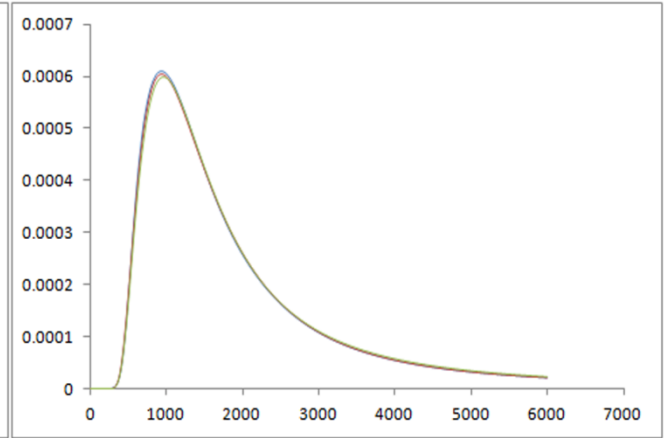

qa

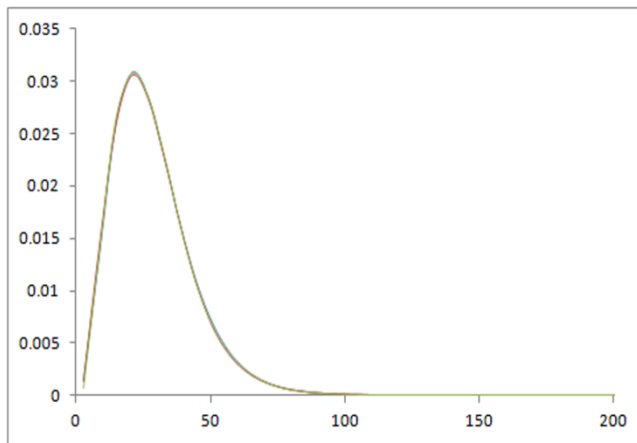

T

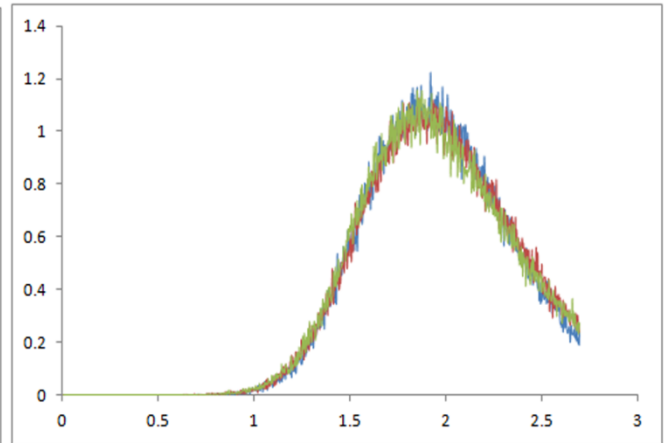

m1&gt;2

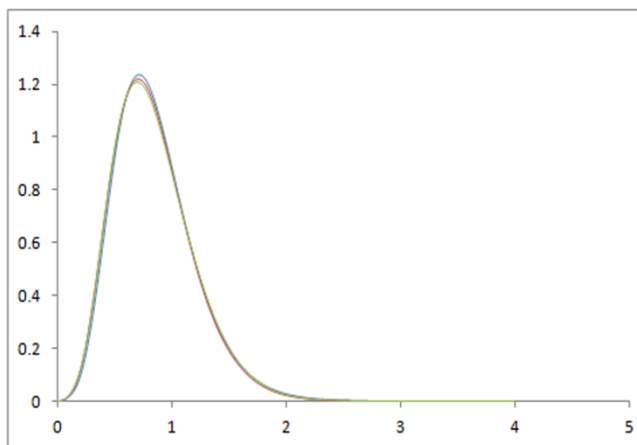

m2&gt;1

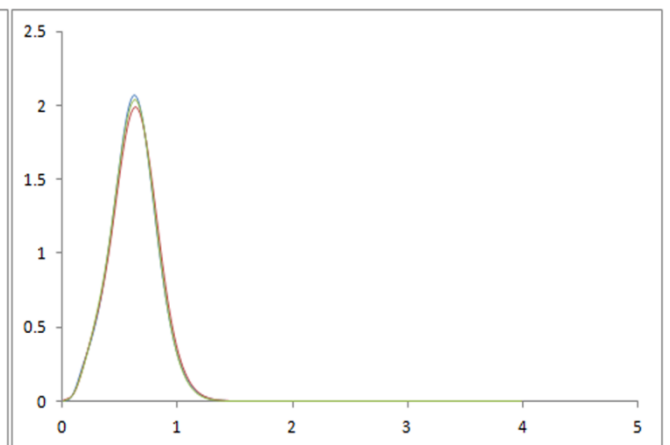

**C**

q1

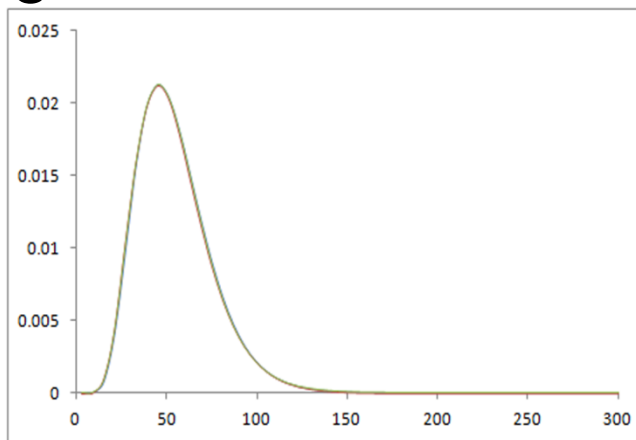

q2

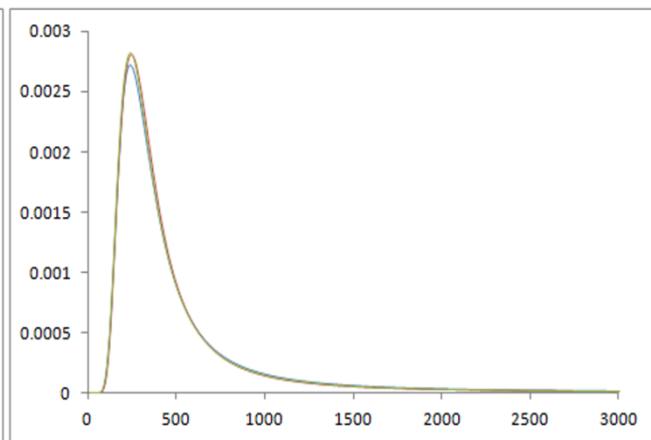

qa

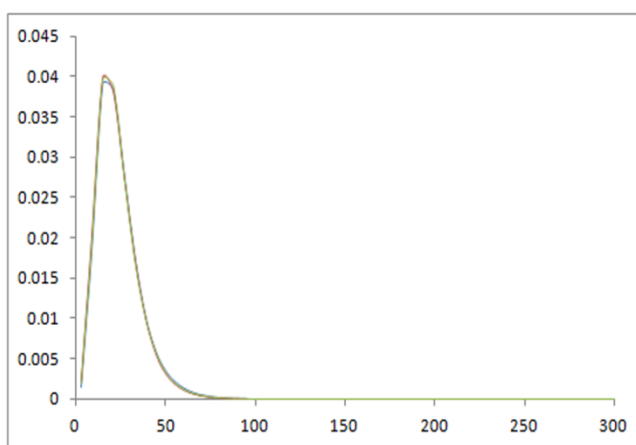

T

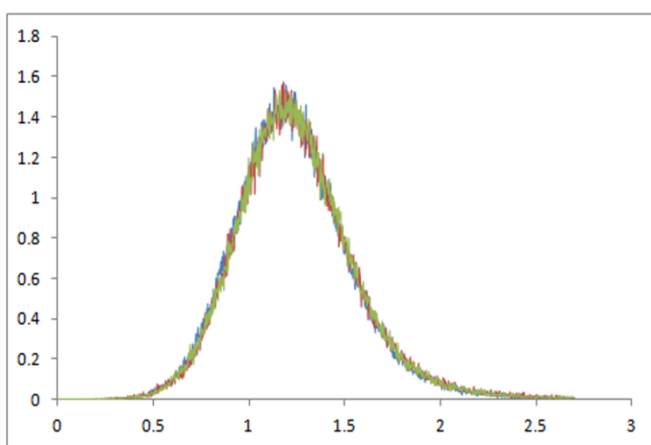

m1&gt;2

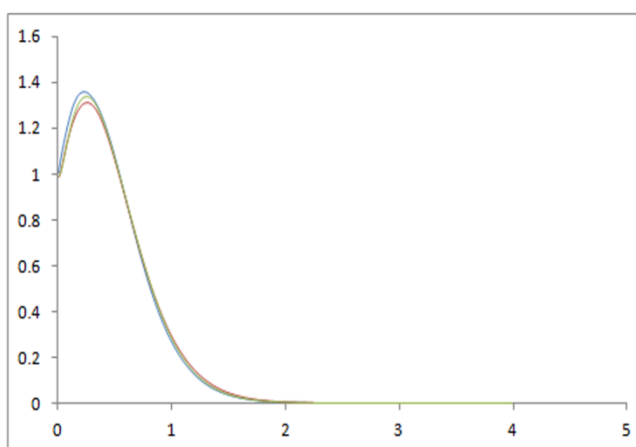

m2&gt;1

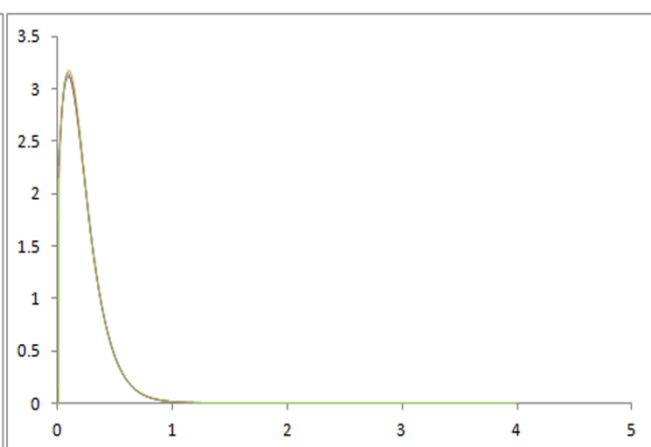

**D**

q1

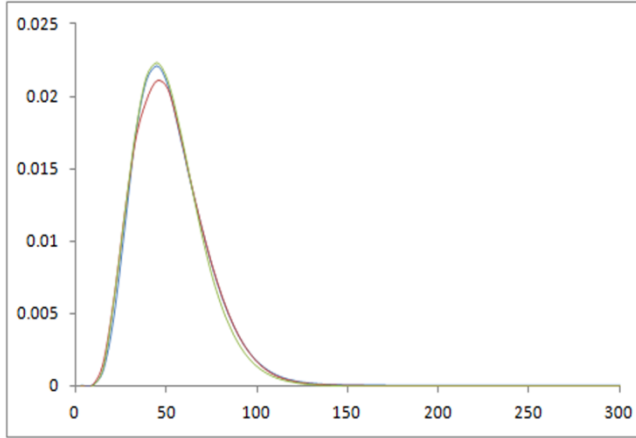

q2

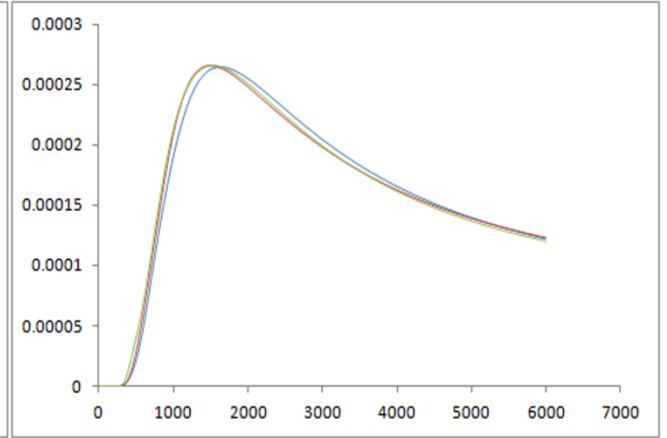

qa

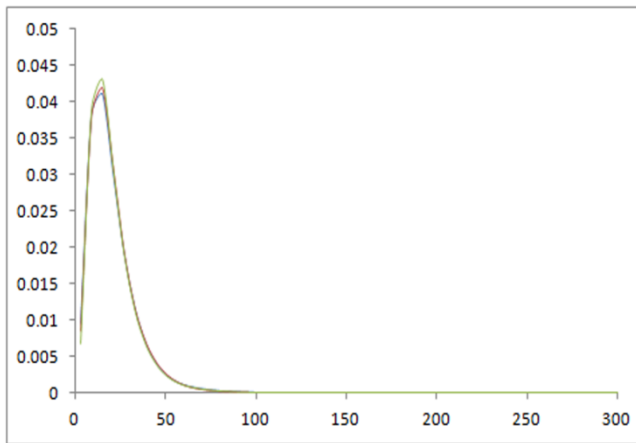

T

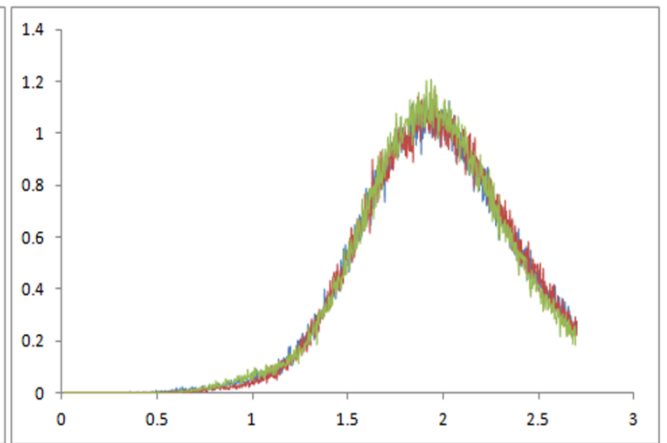

m1&gt;2

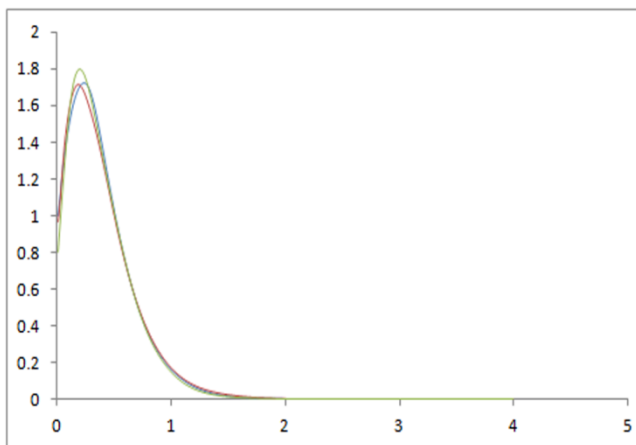

m2&gt;1

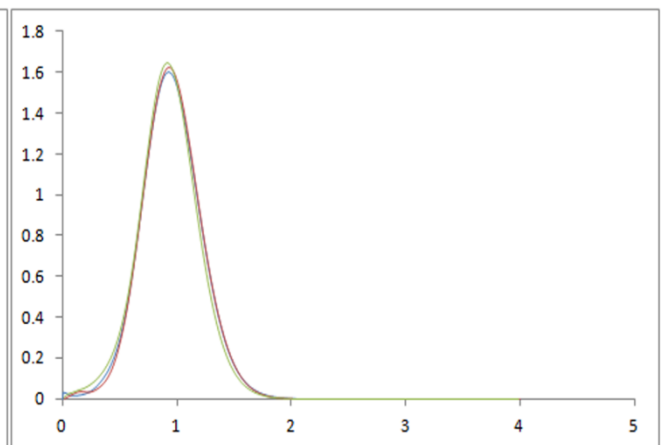

**E**

q1

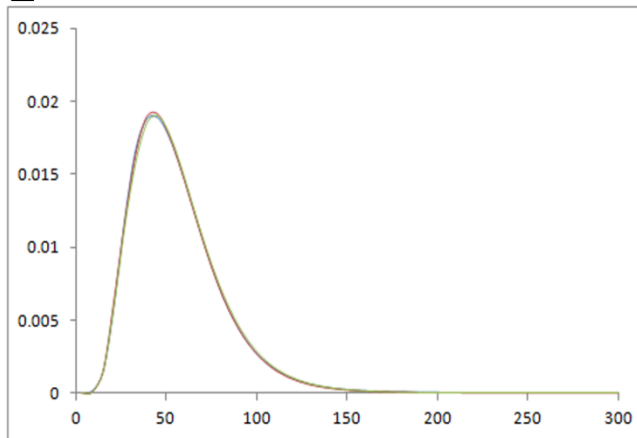

q2

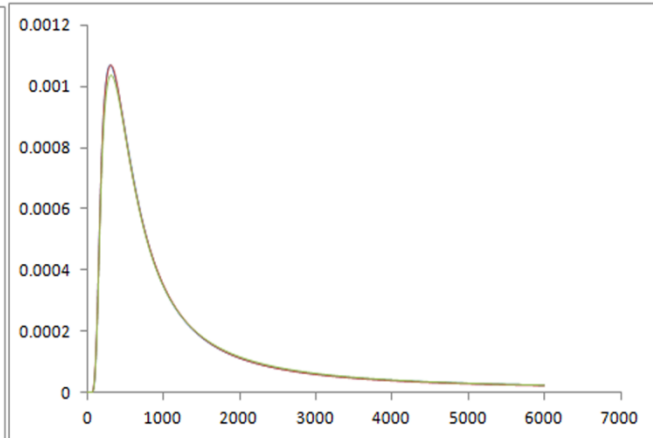

qa

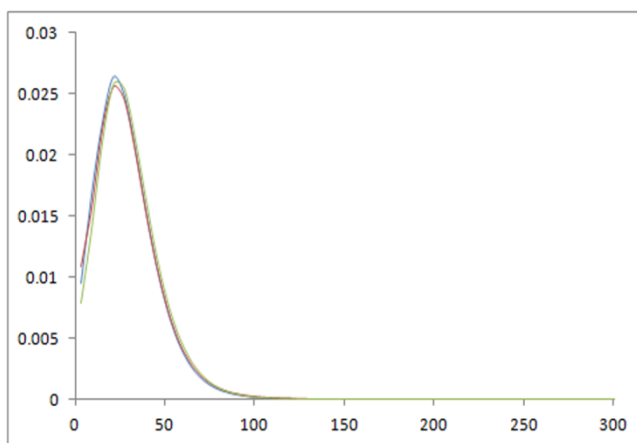

T

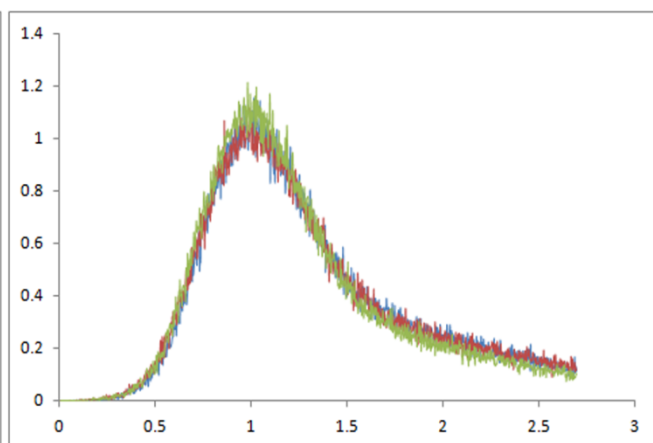

m1&gt;2

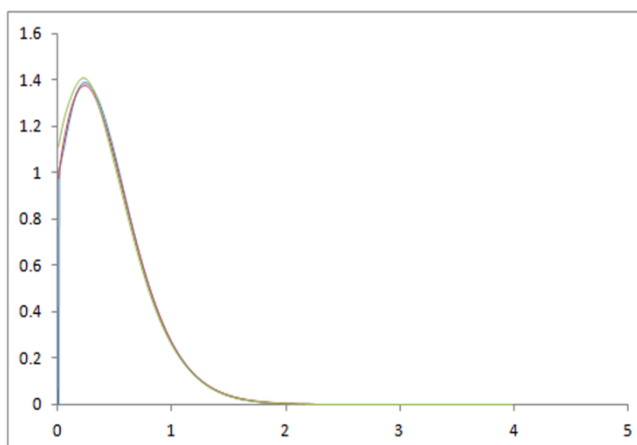

m2&gt;1

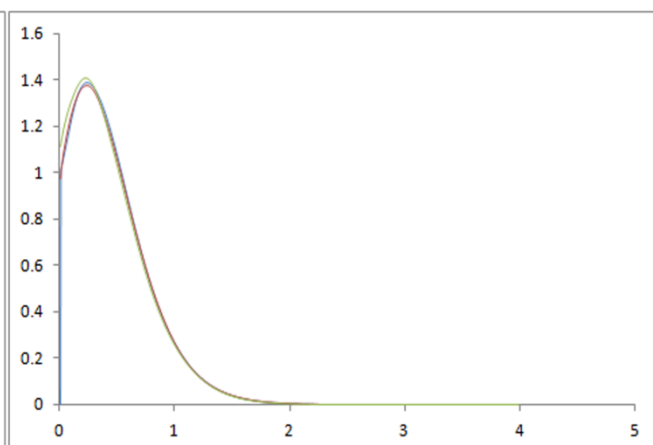

**F**

q1

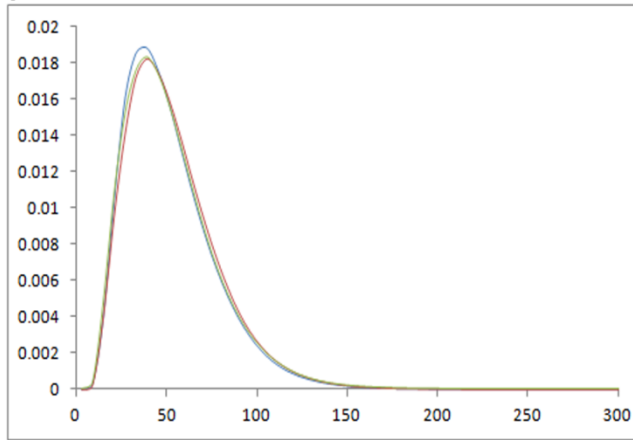

q2

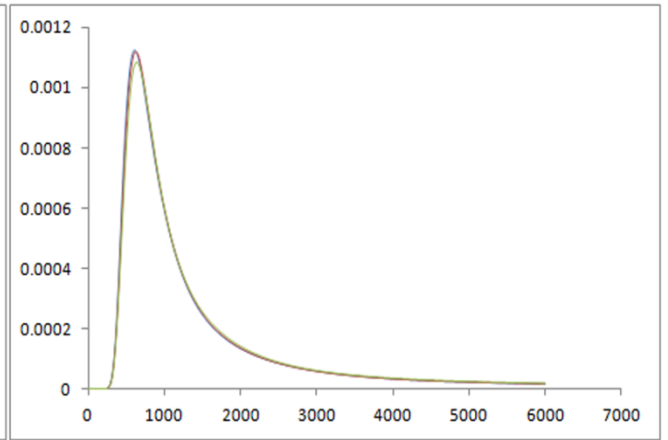

qa

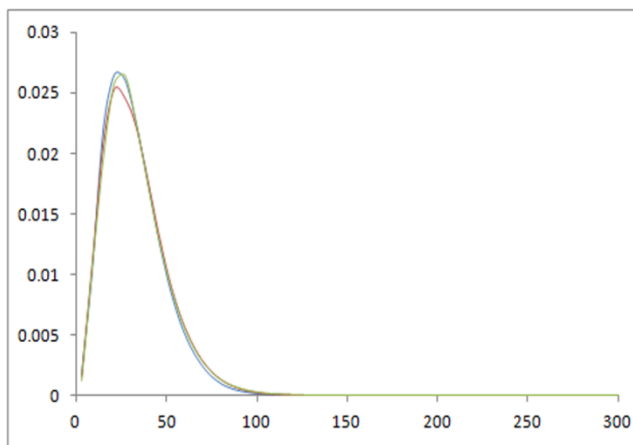

T

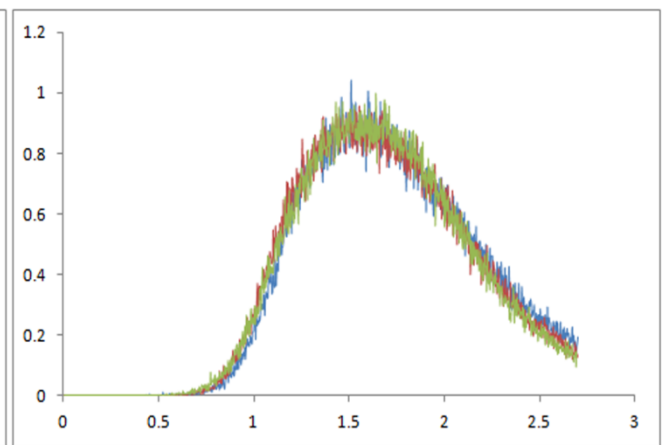

m1&gt;2

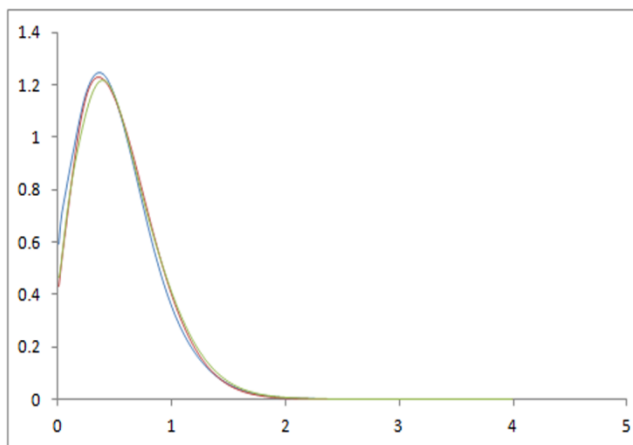

m2&gt;1

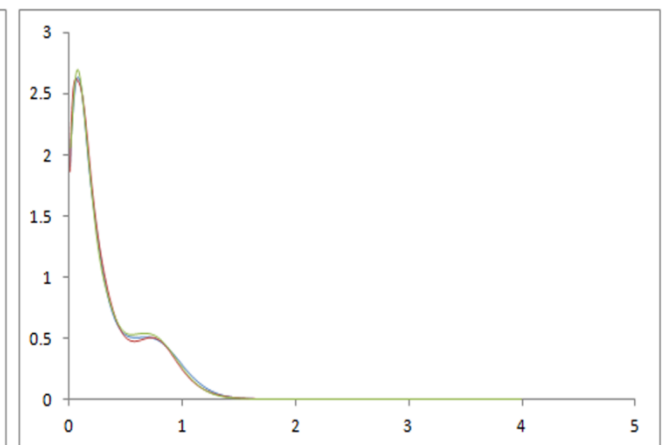

Supplement: pone.0056371.s008.pdf [file pone.0056371.s008.pdf]
