# Supplementary material for: Detecting Genetic Isolation in Human Populations: A Study of European Language Minorities
Source: PubMed Central journal article supplement (PMC3572090; doi:10.1371/journal.pone.0056371), 2013-02-13
Supplement: pone.0056371.s009.pdf [file pone.0056371.s009.pdf]

**Supplementary Figure S2.** Evolutionary topology used for the simulations of the three scenarios.

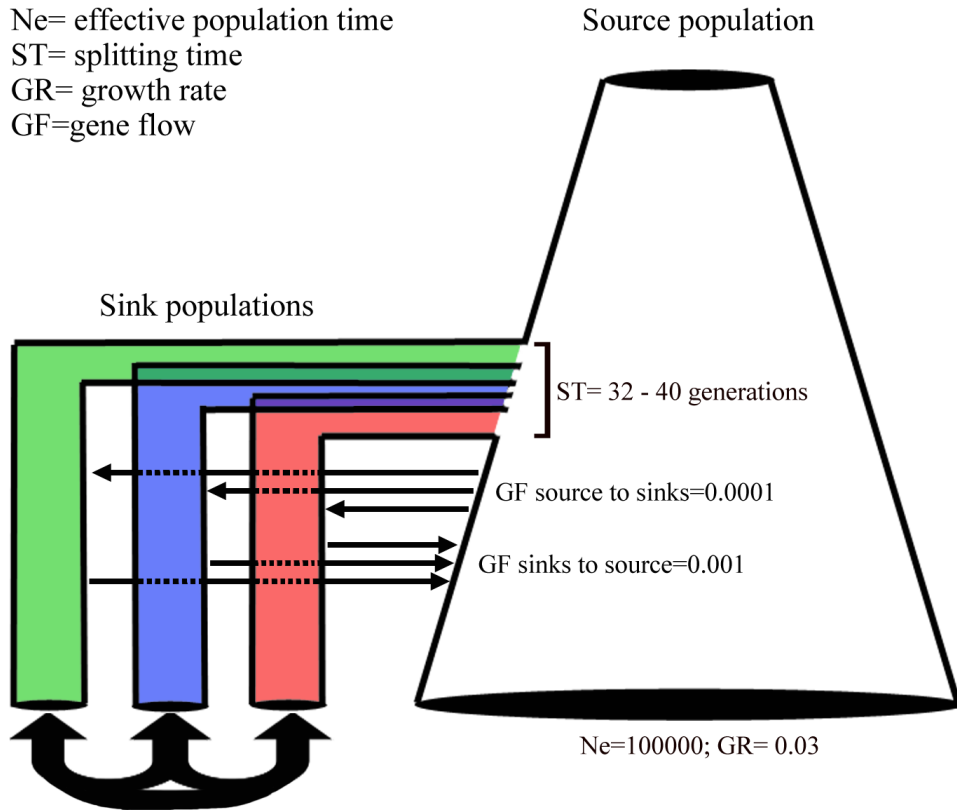

**GF1** sink to sinks = 0 - 0.005; 0 - 0.0025  
**GF2** sink to sinks = 0.015 - 0.02; 0.0075 - 0.01  
**Ne1** sink populations = 100 - 300;  $GR=0.017$   
**Ne2** sink populations = 700 - 900;  $GR=0.017$

Model 1 = **Ne2**; **GF1**  
 Model 2 = **Ne1**; **GF2**  
 Model 3 = **Ne1**; **GF1**
