# Supplementary material for: Detecting Genetic Isolation in Human Populations: A Study of European Language Minorities
Source: PubMed Central journal article supplement (PMC3572090; doi:10.1371/journal.pone.0056371), 2013-02-13

**Supplementary Figure S3.** Nucleotide pairwise mismatch distribution for the populations under study.

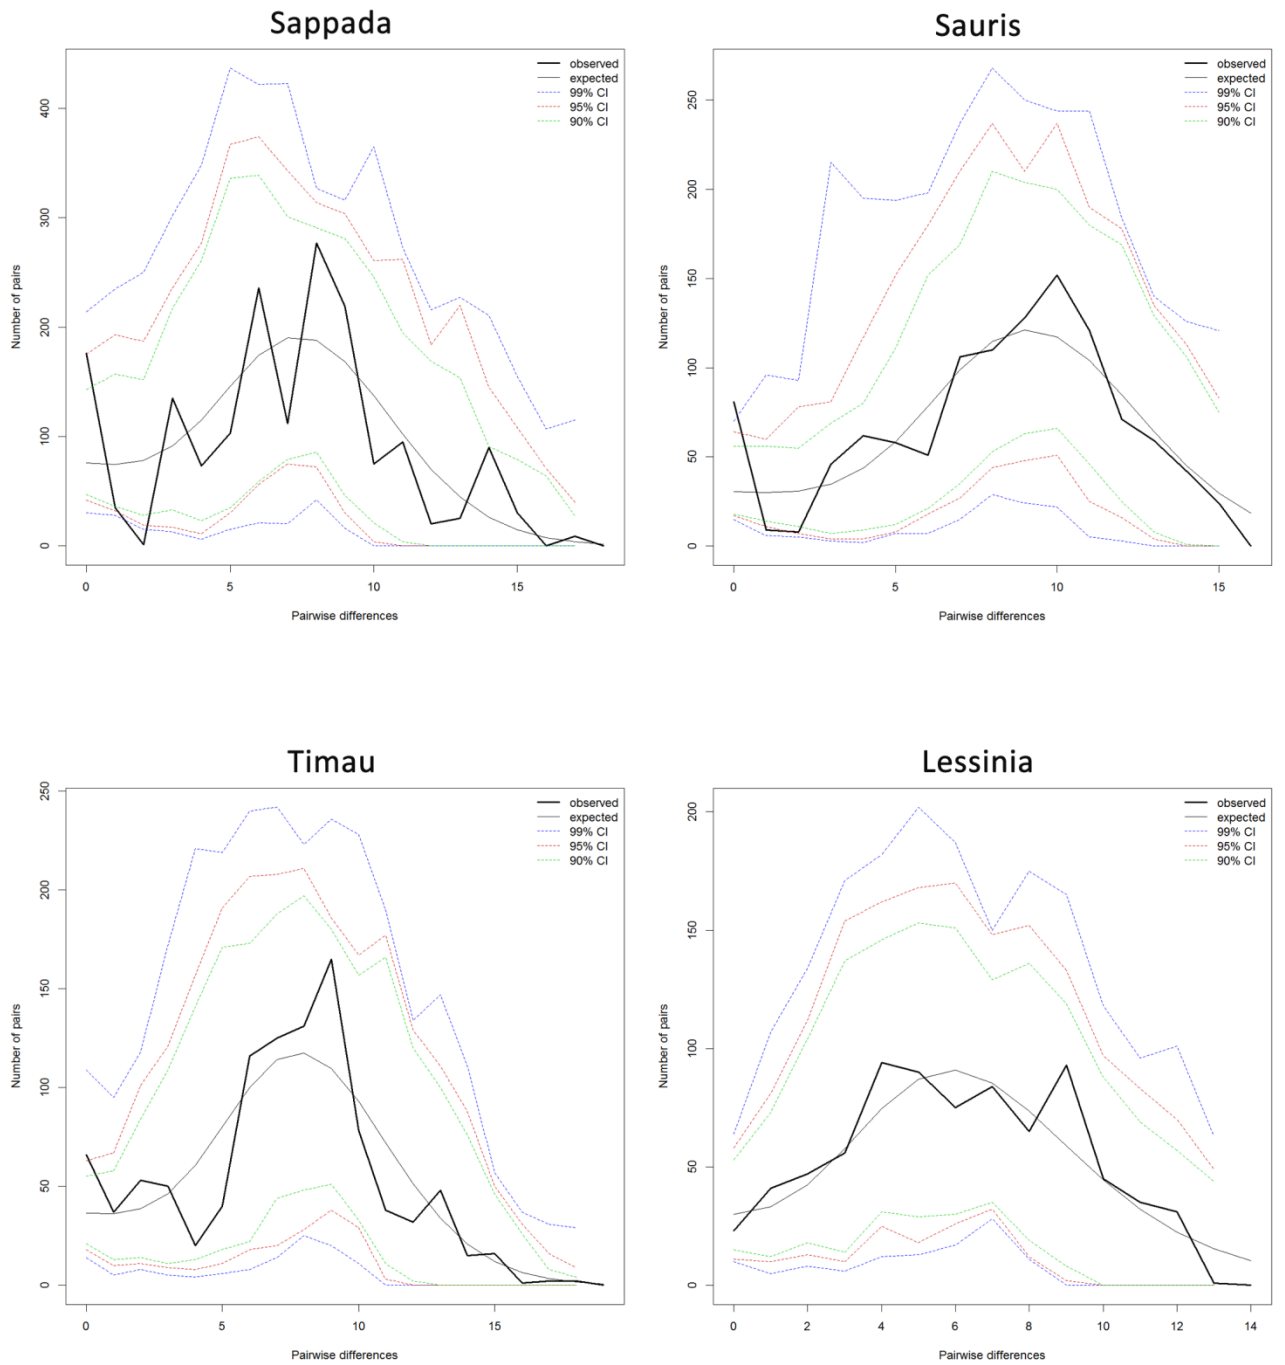

Supplement: pone.0056371.s010.pdf [file pone.0056371.s010.pdf]
