# Supplementary material for: Detecting Genetic Isolation in Human Populations: A Study of European Language Minorities
Source: PubMed Central journal article supplement (PMC3572090; doi:10.1371/journal.pone.0056371), 2013-02-13

**Supplementary figure S4.**  $F_{st}$  value distributions obtained simulating a local ethnicity scenario with original (red line) and modified values (green lines) of gene flow (frames A and B) and effective size settings (frames C and D). Frames E and F show the percentual decrease of  $F_{st}$  modal values obtained with increasing values of gene flow and effective size.

## mtDNA

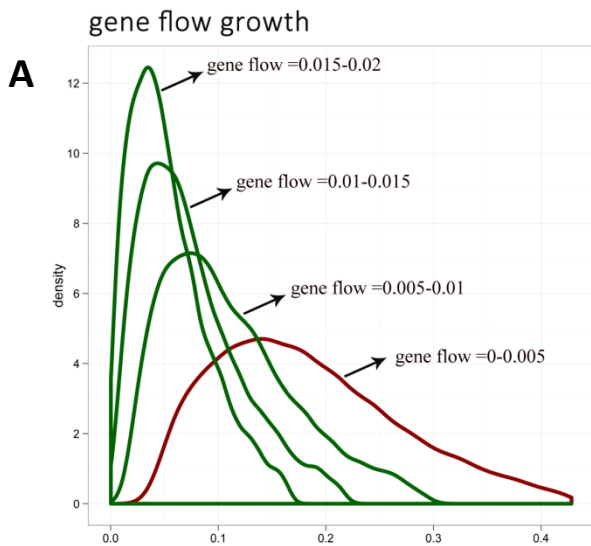

## Y chromosome

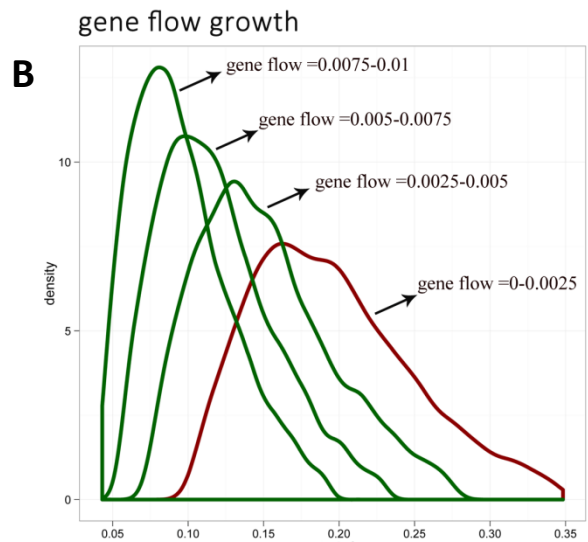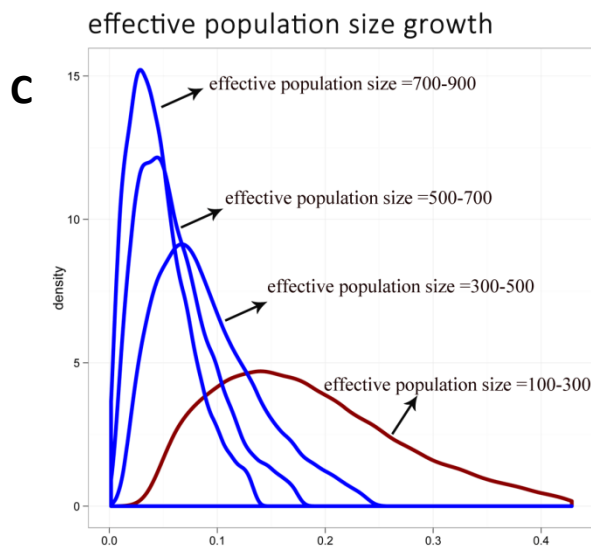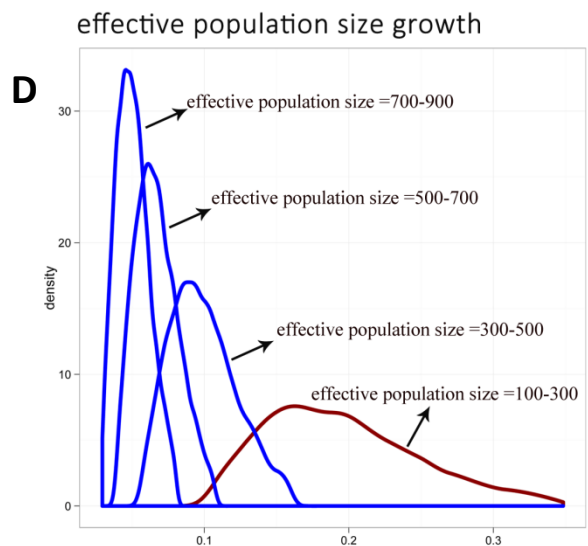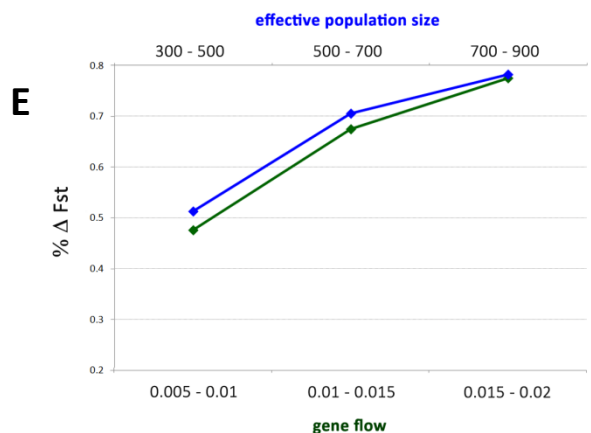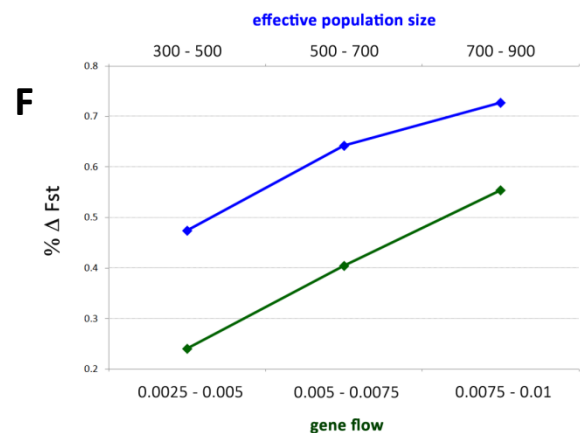

Supplement: pone.0056371.s011.pdf [file pone.0056371.s011.pdf]
